# Supplementary material
Source: publisher figshare collection journal article supplement (https://acs.figshare.com/ndownloader/files/5064742)
Supplement: Supplementary file 1 [file 5064742]

# Observation of solid-state $^{103}\text{Rh}$ NMR by cross-polarization

Brian L. Phillips<sup>1\*</sup>, Jacqueline R. Houston<sup>2</sup>, Jian Feng<sup>3</sup>, William H. Casey<sup>2,4</sup>

## Supporting Information

<sup>1</sup>Department of Geosciences, State University of New York, Stony Brook, NY 11794

<sup>2</sup>Department of Chemistry, University of California, Davis, CA 95616, USA.

<sup>3</sup>Department of Chemistry, State University of New York, Stony Brook, NY 11794,

<sup>4</sup>Department of Geology, University of California, Davis, CA 95616, USA;

\*brian.phillips@stonybrook.edu

## Sample preparation

The mesitylate salt of the hydroxyl-bridged rhodium(III) dimer  $[(\text{H}_2\text{O})_4\text{Rh}(\mu_2\text{-OH})_2\text{Rh}(\text{H}_2\text{O})_4]\cdot(\text{dmtos})_4\cdot 8\text{H}_2\text{O}$  (**I**) was crystallized from a solution prepared by dissolution of the active hydroxide, using a slight excess of 2-mesitylene sulfonic acid as described by Cervini et al <sup>1</sup>. Crystals of the perchlorate salt of the oxo-centered acetate-bridged Rh(III) trimer (Fig. 1b)  $[\text{Rh}_3(\mu_3\text{-O})(\mu\text{-OOCCH}_3)_6(\text{OH}_2)_3]\text{ClO}_4\cdot 2\text{H}_2\text{O}$  (**II**) were prepared by dissolving the Rh(III) active hydroxide in excess acetic acid, which was then heated at 333 K overnight, purified in a cation exchange column and allowed to crystallize upon slow evaporation <sup>2</sup>. The identity of both compounds was confirmed by comparison of the cell parameters determined by X-ray diffraction with published structures. A standard solution of  $\text{Rh}(\text{H}_2\text{O})_6^{3+}(\text{aq})$  was prepared by dissolving the appropriate amount of Rh(III) active hydroxide in  $\text{HClO}_4$  to give a final  $[\text{H}^+] = 1 \text{ M}$  and  $[\text{Rh}^{3+}] = 0.5 \text{ M}$ .

## NMR spectroscopy

The NMR experiments were conducted on a 400 MHz (9.4 T) Varian Inova spectrometer operating at 12.76 MHz for  $^{103}\text{Rh}$  and 399.76 MHz for  $^1\text{H}$ . We used a “T3”-type Varian/Chemagnetics sample probe configured for 7.5 mm (outside diameter) rotors with a Varian “low- $\gamma$ ” tuning accessory. All spectra were taken at 25°C. Initial pulse power was calibrated on the solid sample for  $^1\text{H}$  and on an aqueous  $0.5 \text{ mol L}^{-1}$  solution of the  $\text{Rh}(\text{H}_2\text{O})_6^{3+}$  ion for  $^{103}\text{Rh}$ , which also served as the chemical shift reference at  $\delta_{\text{iso}} \equiv 9915.8 \text{ ppm}$ . The tuning of the  $^{103}\text{Rh}$  channel did not change significantly upon replacement of the solution standard with solid samples. The CP/MAS spectra were collected with standard pulse sequences using CW irradiation at the first side-band match condition with  $\nu_{1,\text{Rh}} = 12.5 \text{ kHz}$  and  $\nu_{1,\text{H}} \approx \nu_{1,\text{Rh}} + \nu_{\text{rot}}$ . These conditions required approximately 230 watts of RF input power to the  $^{103}\text{Rh}$  channel. The

match curve for the dimer salt appeared reasonably broad, ca. 8-10 kHz full-width at half-height, and could be measured in a few hours, making the dimer salt a useful set-up material. Initial set-up at the Hartmann-Hahn match ( $\nu_{1,H} = \nu_{1,Rh} = 12.5$  kHz) was accomplished by independent calibration of each channel through direct  $^1H$ - and  $^{103}Rh$ -observation. For CP, the initial  $^1H$  excitation was a 6  $\mu s$  pulse at  $\nu_{1,H} = 40$  kHz. For the CP/MAS spectra, the total pre-acquisition delay was 75  $\mu s$  (40 kHz spectral window). The resulting time-domain data were shifted -50  $\mu s$  (2 complex points) then the first 100  $\mu s$  (4 complex points) re-calculated by linear prediction prior to transformation to the frequency domain.

The  $^1H$  relaxation times  $T_{1\rho,H}$  and  $T_{2,H}$  were measured by direct observation under non-spinning conditions, using a Chemagnetics probe assembly configured for 4 mm rotors and low  $^1H$  background signal. Initial  $^1H$  excitation and spin echoes used  $\nu_{1,H} = 62.5$  kHz ( $\pi/2 = 4$   $\mu s$ ). The  $^1H$   $T_{1\rho}$ 's were measured at  $\nu_{1,H} = 12.5$  kHz, the same field as used for the CP/MAS measurements.

### Crystal structure determination

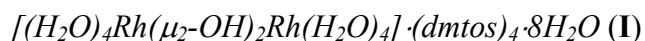

A light yellow block of (I) with approximate orthogonal dimensions 0.32 x 0.26 x 0.17 mm<sup>3</sup> was placed and optically centered on the Bruker APEXII<sup>5</sup> CCD system at -183(2)°C. The initial unit cell was indexed using a least-squares analysis of a random set of reflections collected from three series of 0.3° wide  $\omega$ -scans, 10 seconds per frame, and 30 frames per series that were well distributed in reciprocal space. Five  $\omega$ -scan data frame series were collected [MoK $\alpha$ ] with 0.3° wide scans, 20 seconds per frame and 606 frames collected per series at varying  $\phi$  angles ( $\phi=0^\circ, 72^\circ, 144^\circ, 216^\circ, 288^\circ$ ). The crystal to detector distance was 4.97 cm, thus

providing a complete sphere of data to  $2\theta_{\max}=61.14^\circ$ . A total of 57541 reflections were collected and corrected for Lorentz and polarization effects and absorption using Blessing's method as incorporated into the program SADABS<sup>6,7</sup> with 9054 unique. The SHELXTL<sup>8</sup> program package was implemented to determine the probable space group and set up the initial files. System symmetry, systematic absences and intensity statistics indicated the centrosymmetric monoclinic non-standard space group  $P2_1/c$  (no. 14). The structure was determined by direct methods with the successful location of a majority of the molecule of interest within the asymmetric unit using the program XS<sup>9</sup>. The structure was refined with XL<sup>9</sup>. The 57541 data collected were merged based upon identical indices yielding 33830 data [ $R(\text{int})=0.0165$ ] that were truncated to  $2\theta_{\max}=60.00^\circ$  resulting in 31381 data that were further merged during least-squares refinement to 8183 unique data [ $R(\text{int})=0.0149$ ]. A single least-squares difference-Fourier cycle was required to locate the remaining non-hydrogen atoms and additional difference-Fourier maps were required to locate the hydrogen atoms present. All non-hydrogen atoms were refined anisotropically. Hydrogen atoms were allowed to refine freely throughout the refinement. The final structure was refined to convergence [ $\Delta/\sigma \leq 0.006$ ] with  $R(F)=1.94\%$ ,  $wR(F^2)=4.77\%$ ,  $\text{GOF}=1.096$  for all 8183 unique reflections [ $R(F)=1.89\%$ ,  $wR(F^2)=4.73\%$  for those 8004 data with  $F_o > 4\sigma(F_o)$ ]. The final difference-Fourier map was featureless indicating that the structure is both correct and complete.

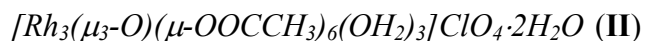

An orange plate of (II) with approximate orthogonal dimensions  $0.49 \times 0.19 \times 0.06 \text{ mm}^3$  was placed and optically centered on the Bruker SMART1000<sup>5</sup> CCD system at  $-183(2)^\circ\text{C}$ . The initial unit cell was indexed using a least-squares analysis of a random set of reflections collected

from three series of  $0.3^\circ$  wide  $\omega$ -scans, 10 seconds per frame, and 25 frames per series that were well distributed in reciprocal space. Five  $\omega$ -scan data frame series were collected [MoK $\alpha$ ] with  $0.3^\circ$  wide scans, 20 seconds per frame and 606 frames collected per series at varying  $\phi$  angles ( $\phi=0^\circ, 72^\circ, 144^\circ, 216^\circ, 288^\circ$ ). The crystal to detector distance was 4.123cm, thus providing a complete sphere of data to  $2\theta_{\max}=61.14^\circ$ . A total of 49838 reflections were collected and corrected for Lorentz and polarization effects and absorption using Blessing's method as incorporated into the program SADABS<sup>6,7</sup> with 7970 unique.

The SHELXTL<sup>8</sup> program package was implemented to determine the probable space group and set up the initial files. System symmetry, systematic absences and intensity statistics indicated the centrosymmetric monoclinic non-standard space group  $P2_1/c$  (no. 14). The structure was determined by direct methods with the successful location of a majority of the molecule of interest within the asymmetric unit using the program XS<sup>9</sup>. The structure was refined with XL<sup>9</sup>. The 49838 data collected were merged based upon identical indices yielding 29624 data [ $R(\text{int})=0.0246$ ] that were truncated to  $2\theta_{\max}=60.00^\circ$  resulting in 28476 data that were further merged during least-squares refinement to 7369 unique data [ $R(\text{int})=0.0293$ ]. A single least-squares difference-Fourier cycle was required to locate the remaining non-hydrogen atoms and additional difference-Fourier maps were required to locate the hydrogen atoms present. All non-hydrogen atoms were refined anisotropically. Hydrogen atoms were allowed to refine freely throughout the refinement. The final structure was refined to convergence [ $\Delta/\sigma \leq 0.002$ ] with  $R(F)=3.14\%$ ,  $wR(F2)=5.44\%$ ,  $\text{GOF}=1.092$  for all 7369 unique reflections [ $R(F)=2.22\%$ ,  $wR(F2)=5.04\%$  for those 6178 data with  $F_o > 4\sigma(F_o)$ ]. The final difference-Fourier map was featureless indicating that the structure is both correct and complete. Due to  $\beta = 90.004(1)^\circ$  an

additional investigation into the cell symmetry was performed using Cellnow<sup>10</sup>, Rlatt<sup>8</sup>, Lepage<sup>11</sup> and Platon<sup>12</sup>; all of which confirmed the current unit cell to be correct.

## References

1. Cervini, R.; Fallon, G. D.; Spiccia, L., *Inorg. Chem.* **1991**, *30*, 831-836.
2. Houston, J. R.; Yu, P.; Casey, W. H., *Inorg. Chem.* **2005**, *44*, 5176-5182.
3. Hung, I.; Rossini, A. J.; Schurko, R. W., *J. Phys. Chem. A* **2004**, *108*, 7112-7120.
4. Siegel, R.; Nakashima, T. T.; Wasylshen, R. E., *J. Phys. Chem. B* **2004**, *108*, 2218-2226
5. Bruker (2004) SMART (Version 5.054) and SAINT (Version 7.16b). Bruker AXS Inc., Madison, Wisconsin, USA.
6. Blessing, R. H., *Acta Cryst. A* **1995**, *51*, 33-38.
7. Sheldrick, G.M., SADABS (2003) Version 2.10, 'Siemens Area Detector Absorption Correction' Universität Göttingen: Göttingen, Germany.
8. Sheldrick, G.M., (2002). SHELXTL. Version 6.1. Bruker AXS Inc., Madison, Wisconsin, USA.
9. Sheldrick, G. M., (1997). SHELXS97 and SHELXL97. Universität Göttingen: Göttingen, Germany.
10. Sheldrick, G.M., (private communication) CELLNOW, Twin matrix determination program, Universität Göttingen: Göttingen, Germany, 2003.
11. Spek, A.L., Determination of the metrical symmetry of a lattice following an algorithm published by Y. LePage (NRC-Ottawa/Canada).
12. Spek, A.L., *J.Appl.Cryst.* **2003**, *36*, 7-13.
